# Supplementary material
Source: PubMed Central journal article supplement (PMC1356548)

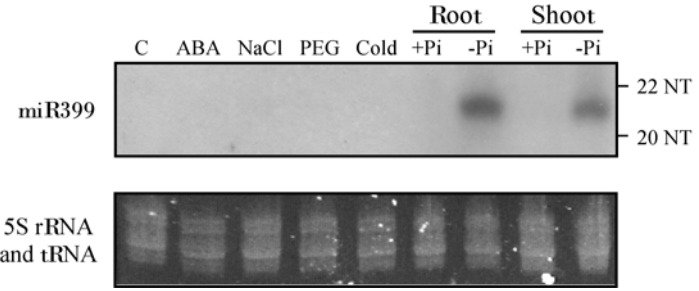

Supplement: plntcell_tpc.105.038943_1.pdf [file plntcell_tpc.105.038943_1.pdf]

**A**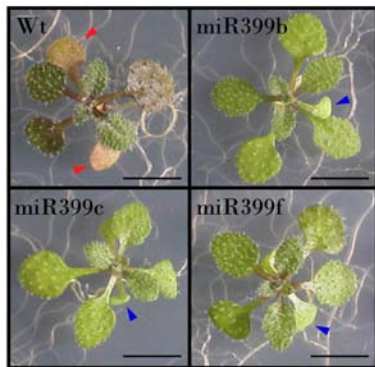**B**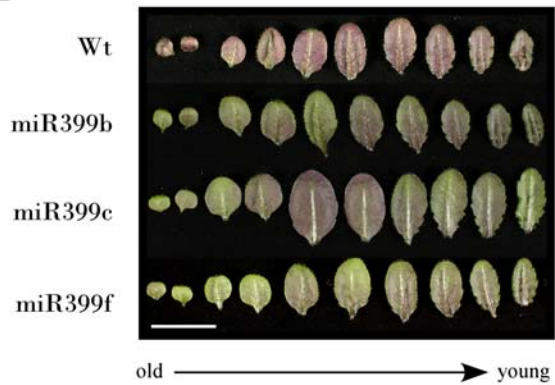**C. Low Pi**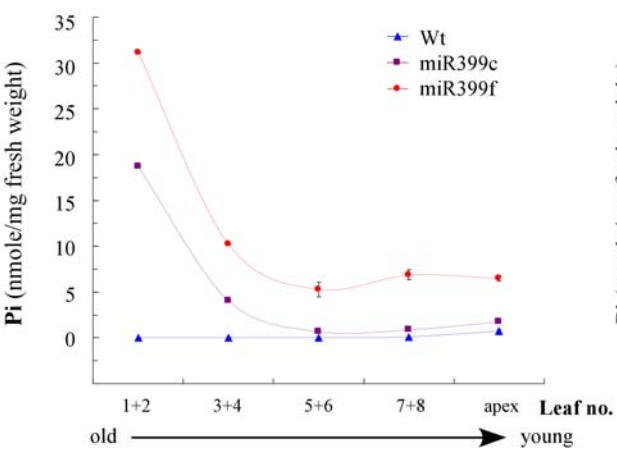**D. High Pi**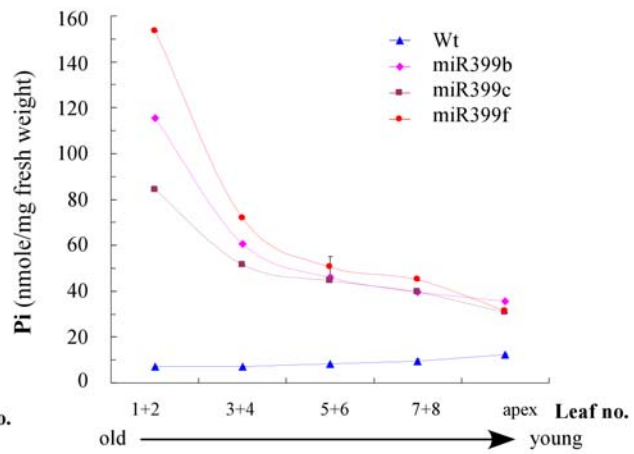

Supplement: plntcell_tpc.105.038943_2.pdf [file plntcell_tpc.105.038943_2.pdf]
